# Supplementary material for: Discovery of New Hydrazone-Thiazole Polyphenolic Antioxidants through Computer-Aided Design and In Vitro Experimental Validation
Source: MDPI journal article supplement (doi:10.3390/ijms241713277), 2023-08-26

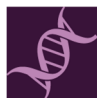

Supplementary Material

# Discovery of New Hydrazone-Thiazole Polyphenolic Antioxidants through Computer-Aided Design and In Vitro Experimental Validation

Gabriel Marc <sup>1</sup>, Anca Stana <sup>1,\*</sup>, Mihaela Tertiş <sup>2</sup>, Cecilia Cristea <sup>2</sup>, Alexandra Ciorîță <sup>3</sup>, Ștefan-Mihai Drăgan <sup>4</sup>, Vlad-Alexandru Toma <sup>4,5</sup>, Raluca Borlan <sup>6</sup>, Monica Focșan <sup>6</sup>, Adrian Pîrnău <sup>3</sup>, Laurian Vlase <sup>7</sup>, Smaranda Oniga <sup>8</sup> and Ovidiu Oniga <sup>1</sup>

- <sup>1</sup> Department of Pharmaceutical Chemistry, “Iuliu Hațieganu” University of Medicine and Pharmacy, 41 Victor Babeș Street, RO-400012 Cluj-Napoca, Romania; marc.gabriel@umfcluj.ro (G.M.); stana.anca@umfcluj.ro (A.S.); oniga@umfcluj.ro (O.O.)
  - <sup>2</sup> Department of Analytical Chemistry, Faculty of Pharmacy, “Iuliu Hațieganu” University of Medicine and Pharmacy, 4 Louis Pasteur Street, RO-400349 Cluj-Napoca, Romania; mihaela.tertis@umfcluj.ro (M.T.); ccristea@umfcluj.ro (C.C.)
  - <sup>3</sup> National Institute for Research and Development of Isotopic and Molecular Technologies, 67-103 Donath Street, RO-400293 Cluj-Napoca, Romania; alexandra.ciorita@itim-cj.ro (A.C.); apirna@itim-cj.ro (A.P.)
  - <sup>4</sup> Department of Molecular Biology and Biotechnology, Faculty of Biology and Geology, Babeș-Bolyai University, Clinicilor Street No. 4-7, RO-400006 Cluj-Napoca, Romania; stefandragan81@gmail.com (Ș.-M.D.); vlad.toma@ubbcluj.ro (V.-A.T.)
  - <sup>5</sup> Institute of Biological Research, Republicii Street No. 48, Branch of NIRDBS Bucharest, RO-400015 Cluj-Napoca, Romania
  - <sup>6</sup> Nanobiophotonics and Laser Microspectroscopy Centre, Interdisciplinary Research Institute in Bio-Nano-Sciences, Babeș-Bolyai University, RO-400084 Cluj-Napoca, Romania; raluca.borlan@ubbcluj.ro (R.B.); monica.iosin@ubbcluj.ro (M.F.)
  - <sup>7</sup> Department of Pharmaceutical Technology and Biopharmaceutics, “Iuliu Hațieganu” University of Medicine and Pharmacy, 41 Victor Babeș Street, RO-400012 Cluj-Napoca, Romania; laurian.vlase@umfcluj.ro (L.V.)
  - <sup>8</sup> Department of Therapeutic Chemistry, “Iuliu Hațieganu” University of Medicine and Pharmacy, 12 Ion Creangă Street, RO-400010 Cluj-Napoca, Romania; smaranda.oniga@umfcluj.ro (S.O.)
- \* Correspondence: stana.anca@umfcluj.ro or teodora\_anca@yahoo.com; Tel.: +40-264-450-529

**Citation:** Marc, G.; Stana, A.; Tertiş, M.; Cristea, C.; Ciorîță, A.; Drăgan, Ș.-M.; Toma, V.-A.; Borlan, R.; Focșan, M.; Pîrnău, A.; et al. Discovery of New Hydrazone-Thiazole Polyphenolic Antioxidants through Computer-Aided Design and In Vitro Experimental Validation. *Int. J. Mol. Sci.* **2023**, *24*, x. <https://doi.org/10.3390/xxxxx>

Academic Editor(s): Name

Received: 28 July 2023

Revised: 12 August 2023

Accepted: date

Published: date

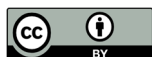

**Copyright:** © 2023 by the authors. Submitted for possible open access publication under the terms and conditions of the Creative Commons Attribution (CC BY) license (<https://creativecommons.org/licenses/by/4.0/>).

## 1. Figures

### 1.1. The IR spectra of the compounds

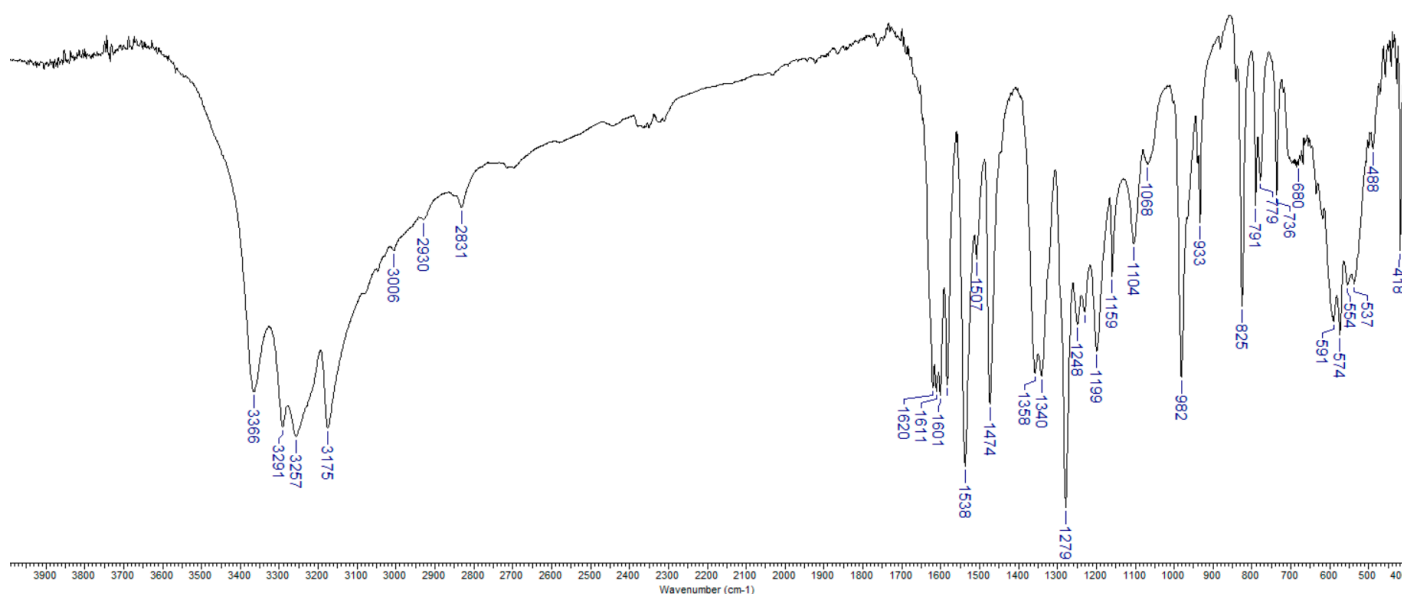

Figure S1. The IR spectrum for the compound 3b.

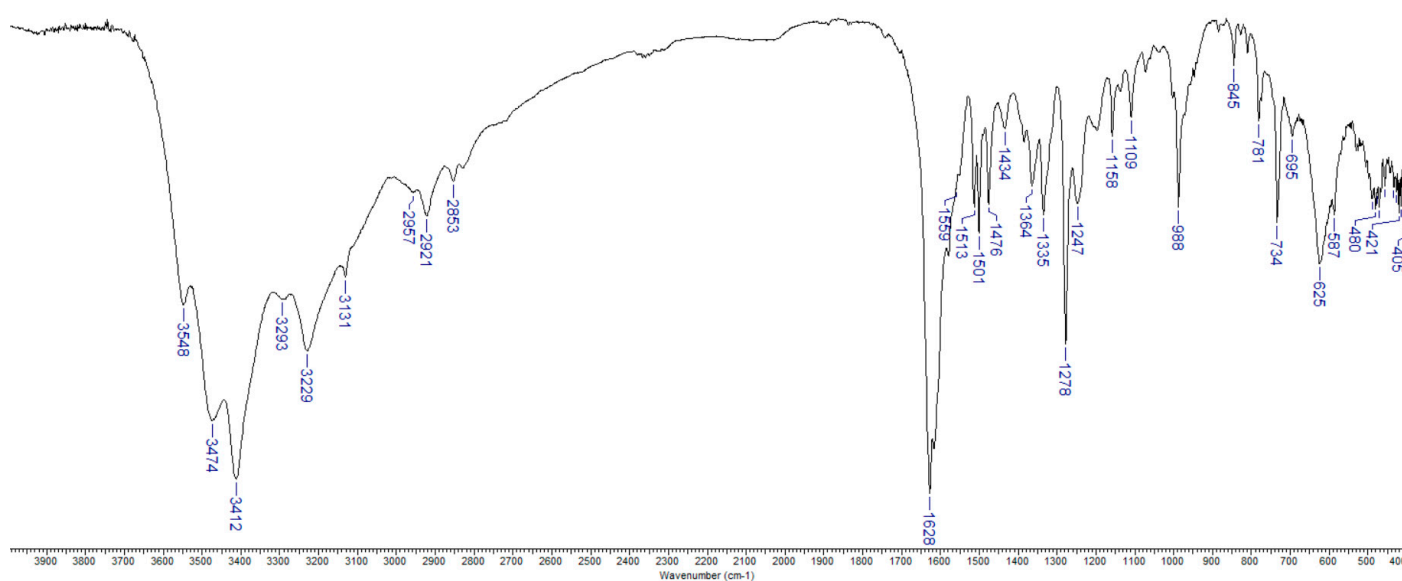

Figure S2. The IR spectrum of the compound 6b.

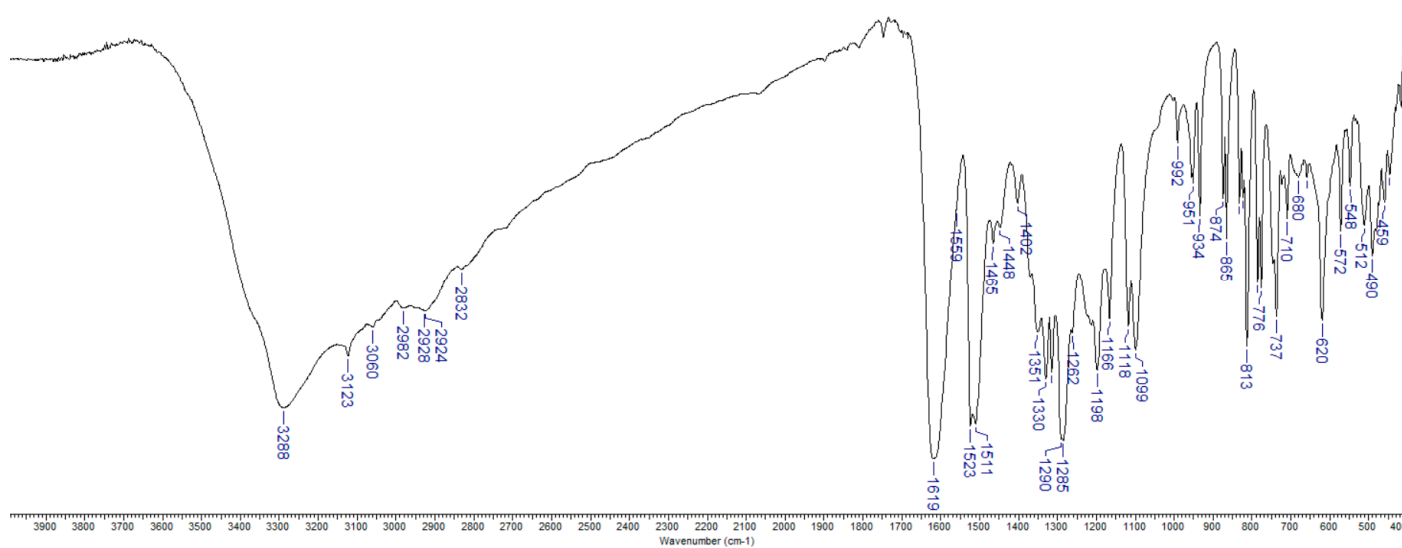

Figure S3. The IR spectrum of the compound 7a.

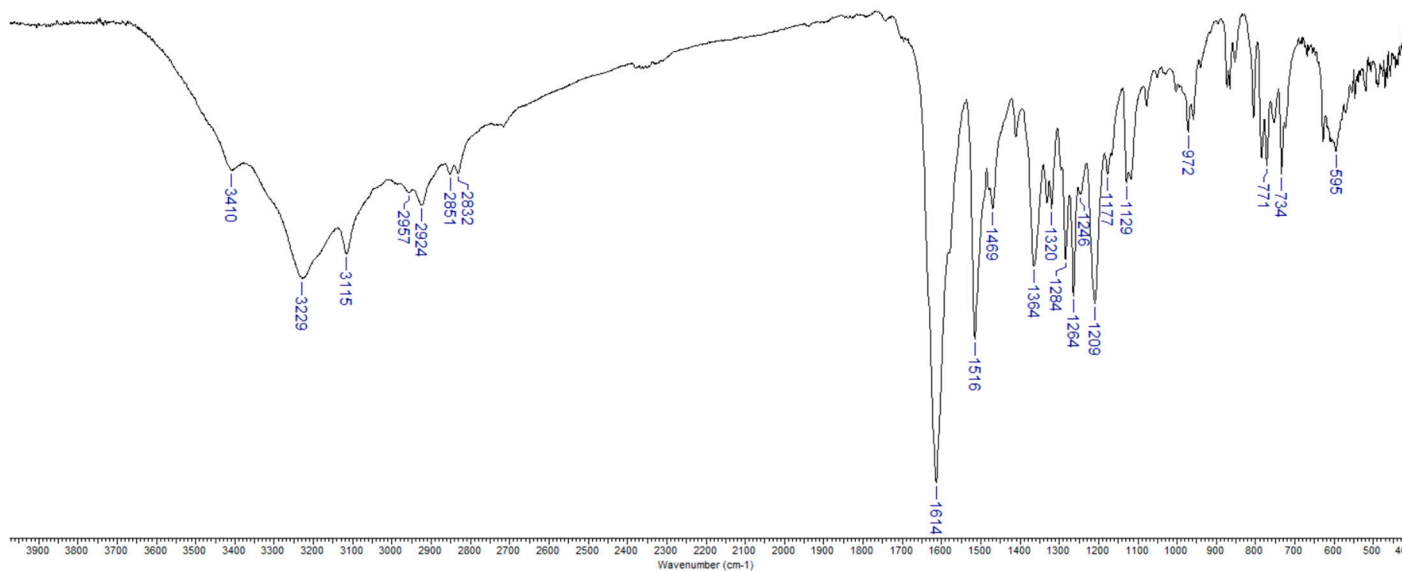

Figure S4. The IR spectrum of the compound 7b.

## 1.2. The mass spectra of the compounds

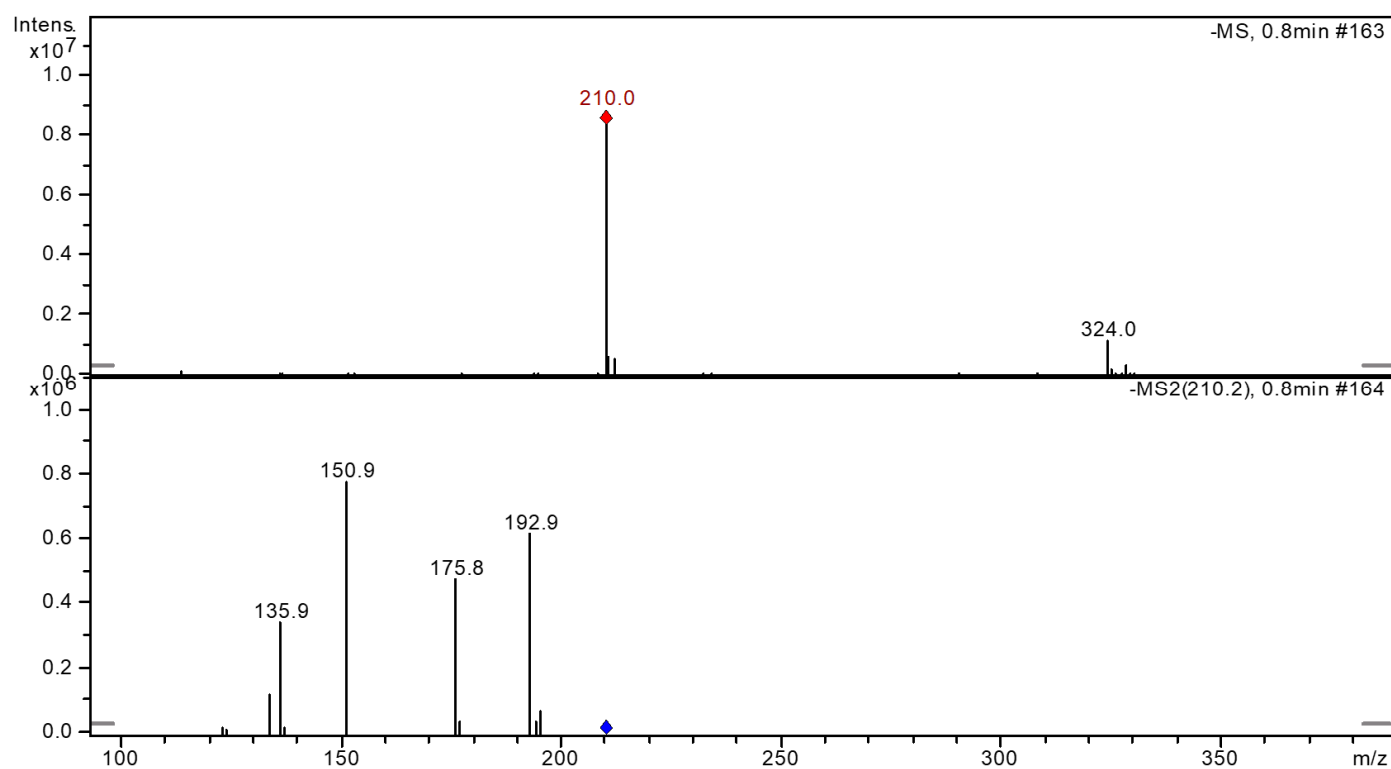

Figure S5. The mass spectrum of the compound 3b.

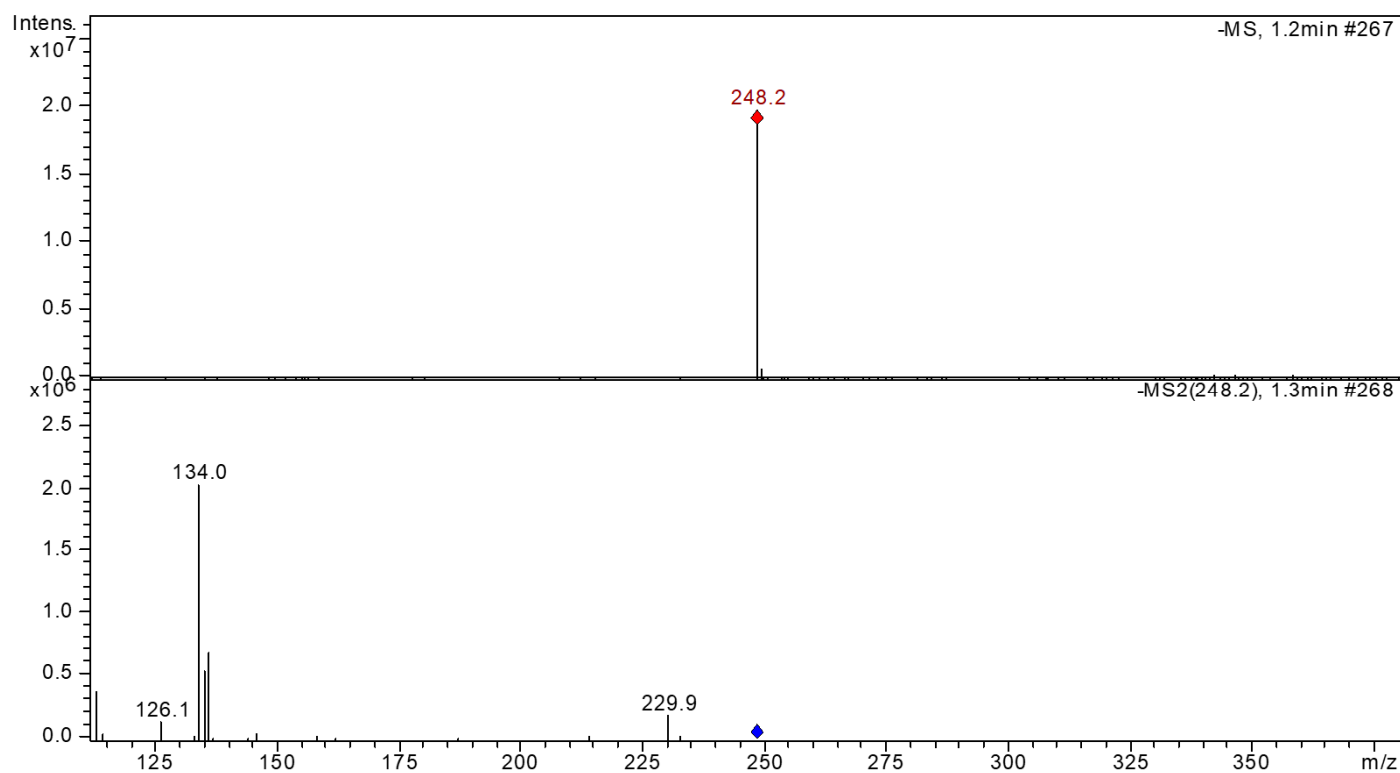

Figure S6. The mass spectrum of the compound 6b.

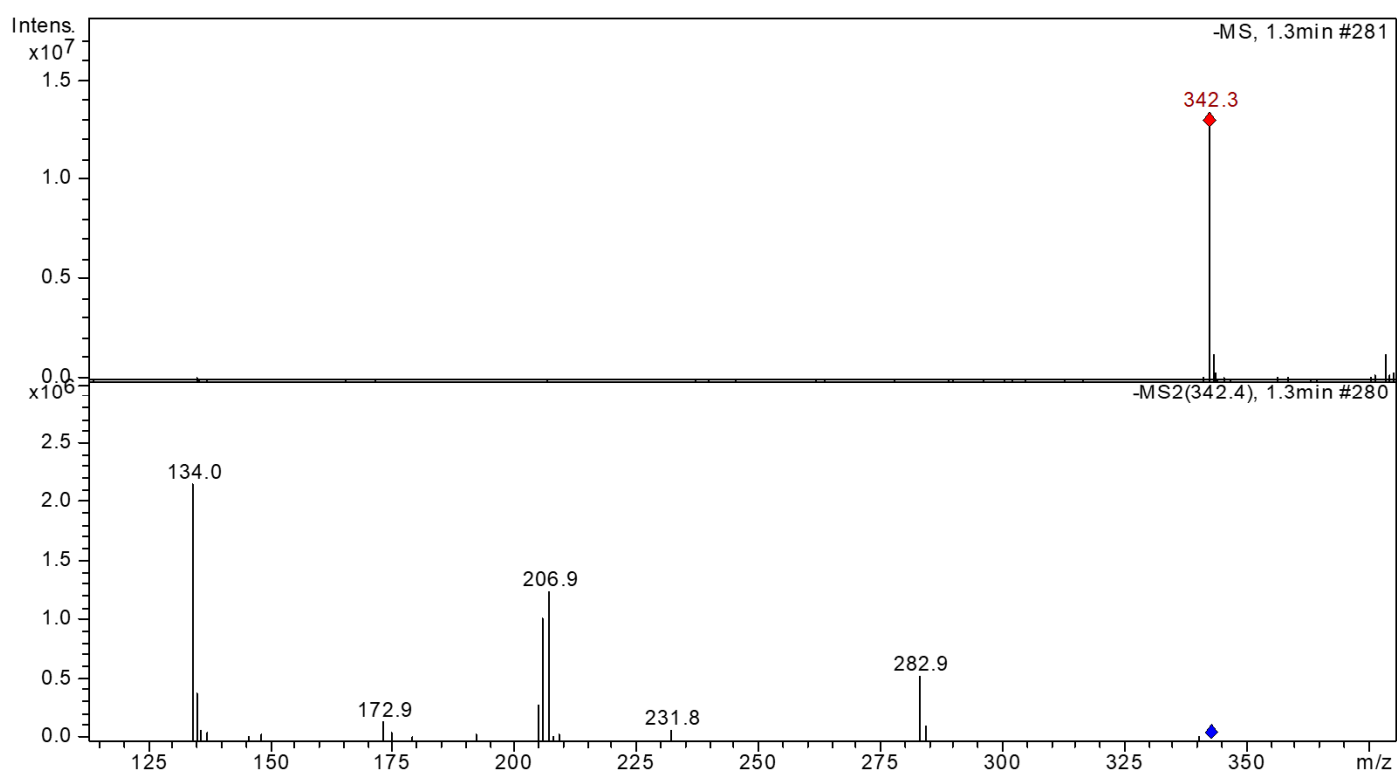

Figure S7. The mass spectrum of the compound 7a.

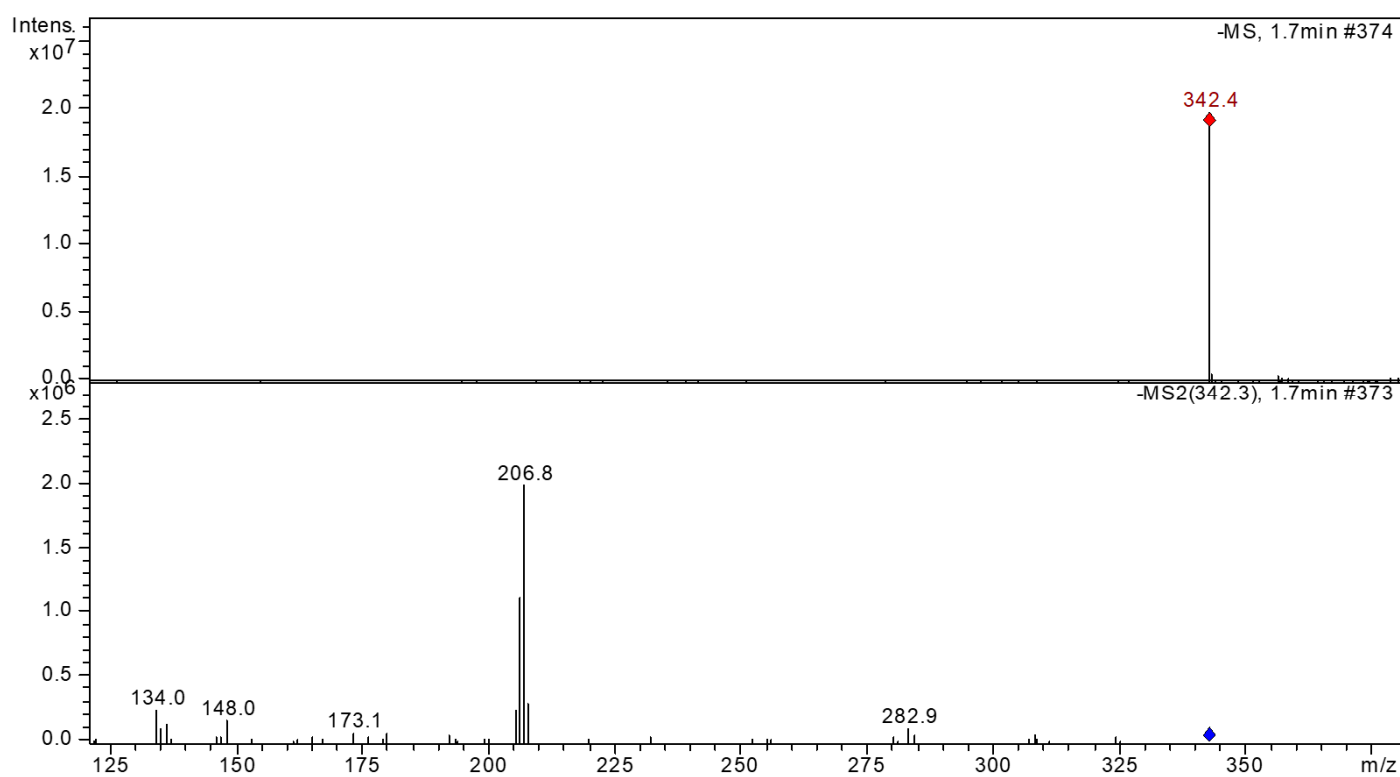

Figure S8. The mass spectrum of the compound 7b.

### 1.3. The $^1\text{H}$ NMR spectra of the compounds

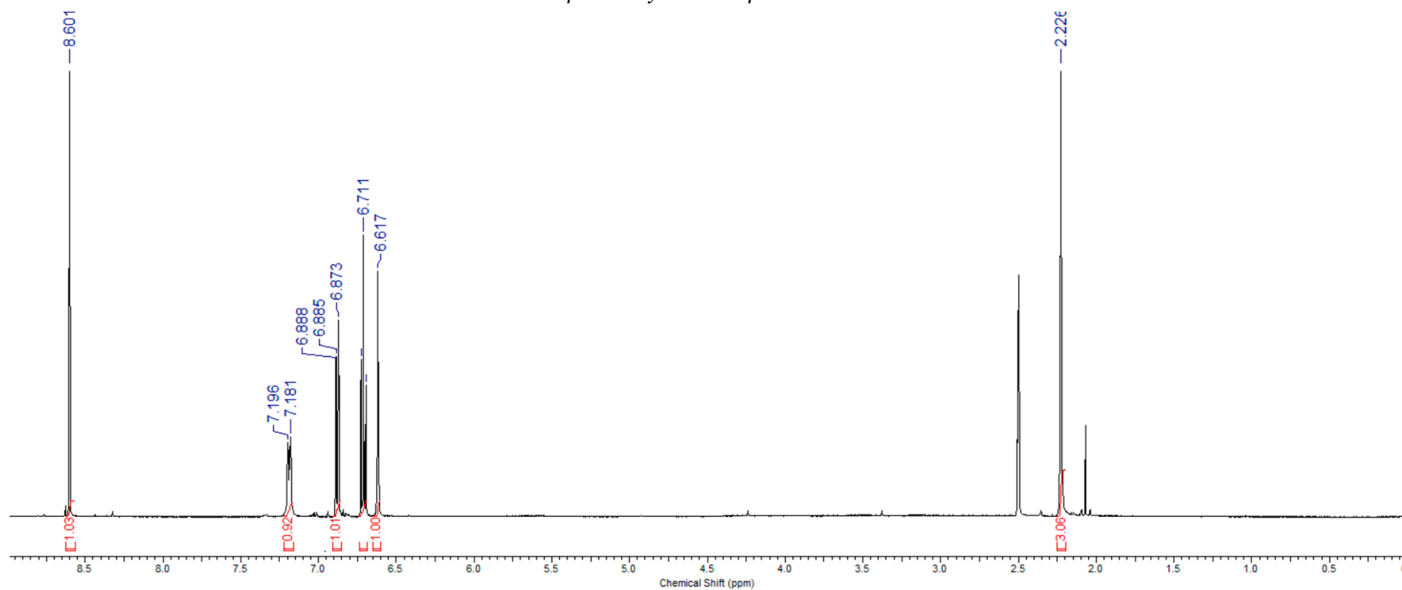

Figure S9. The  $^1\text{H}$  NMR spectrum of the compound **6b**.

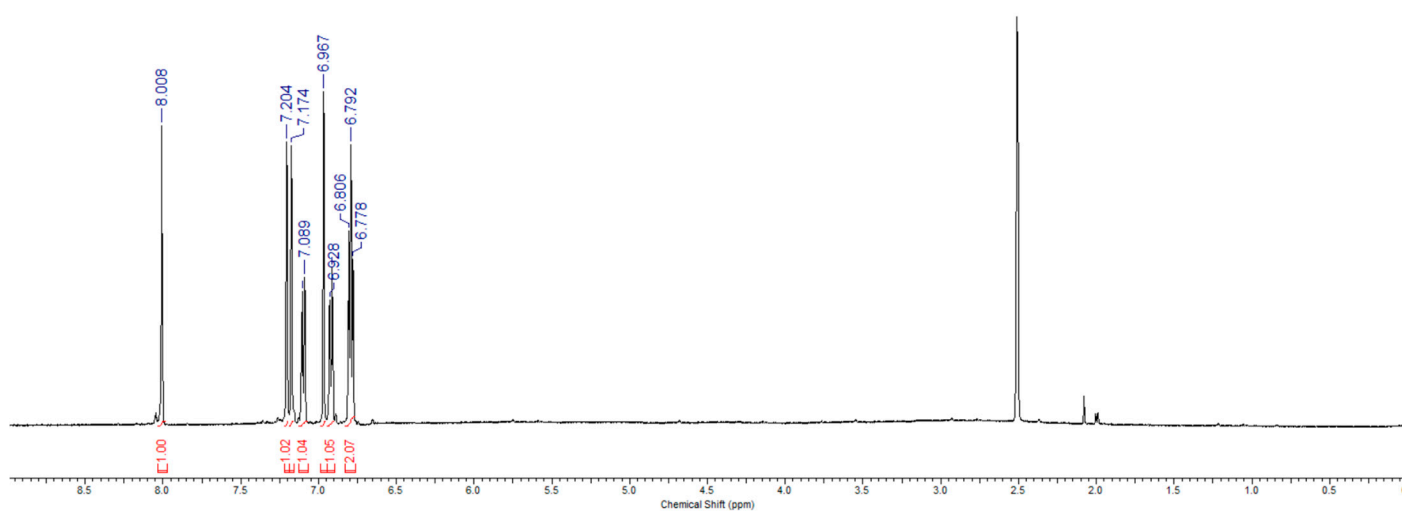

Figure S10. The  $^1\text{H}$  NMR spectrum of the compound **7a**.

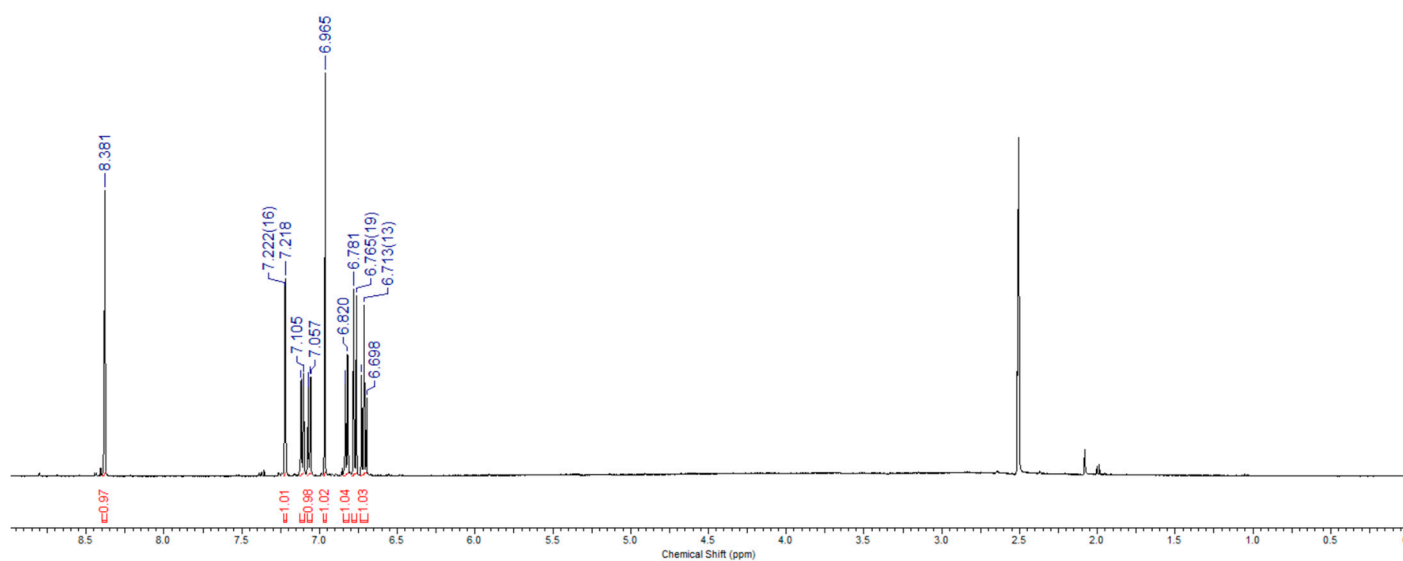

Figure S11. The  $^1\text{H}$  NMR spectrum of the compound **7b**.

#### 1.4. The $^{13}\text{C}$ NMR spectra of the compounds

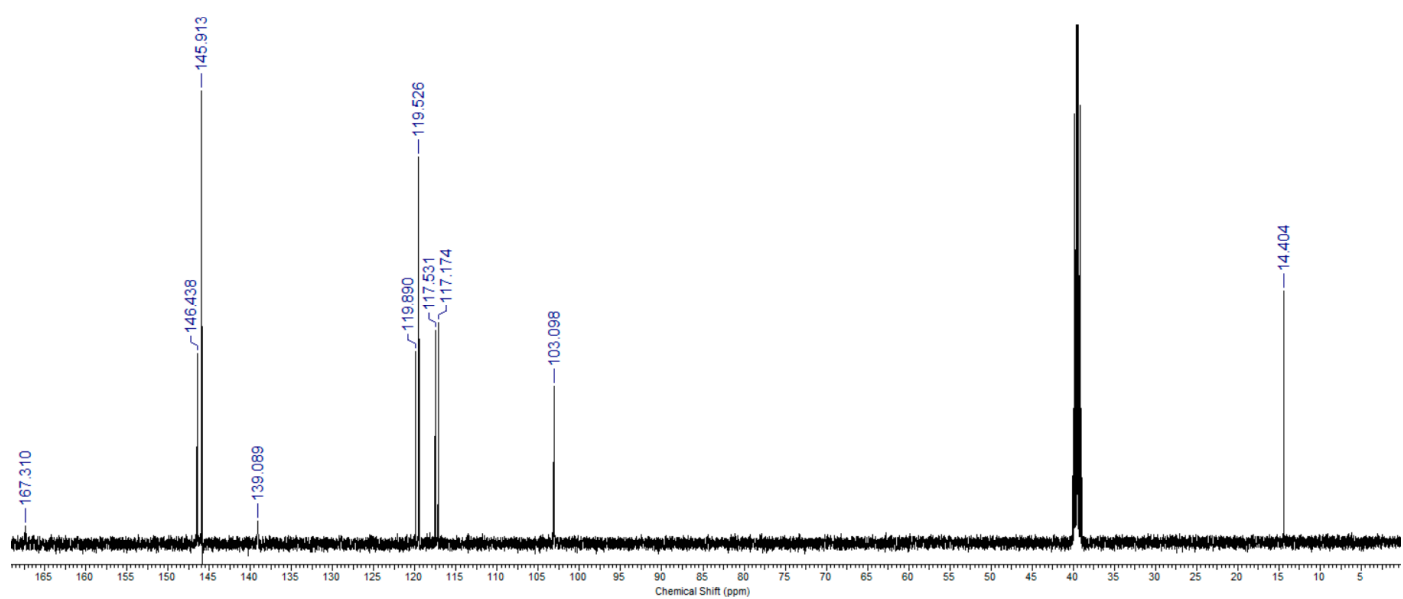

Figure S12. The  $^{13}\text{C}$  NMR spectrum of the compound **6b**.

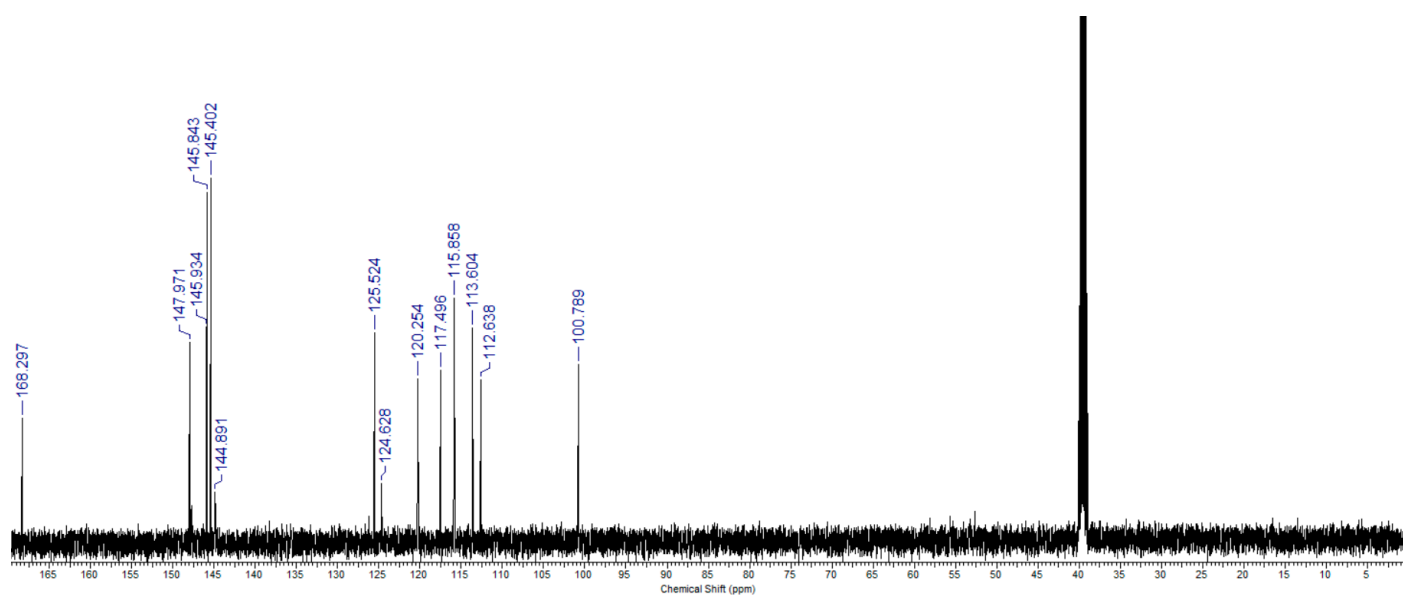

Figure S13. The <sup>13</sup>C NMR spectrum of the compound 7a.

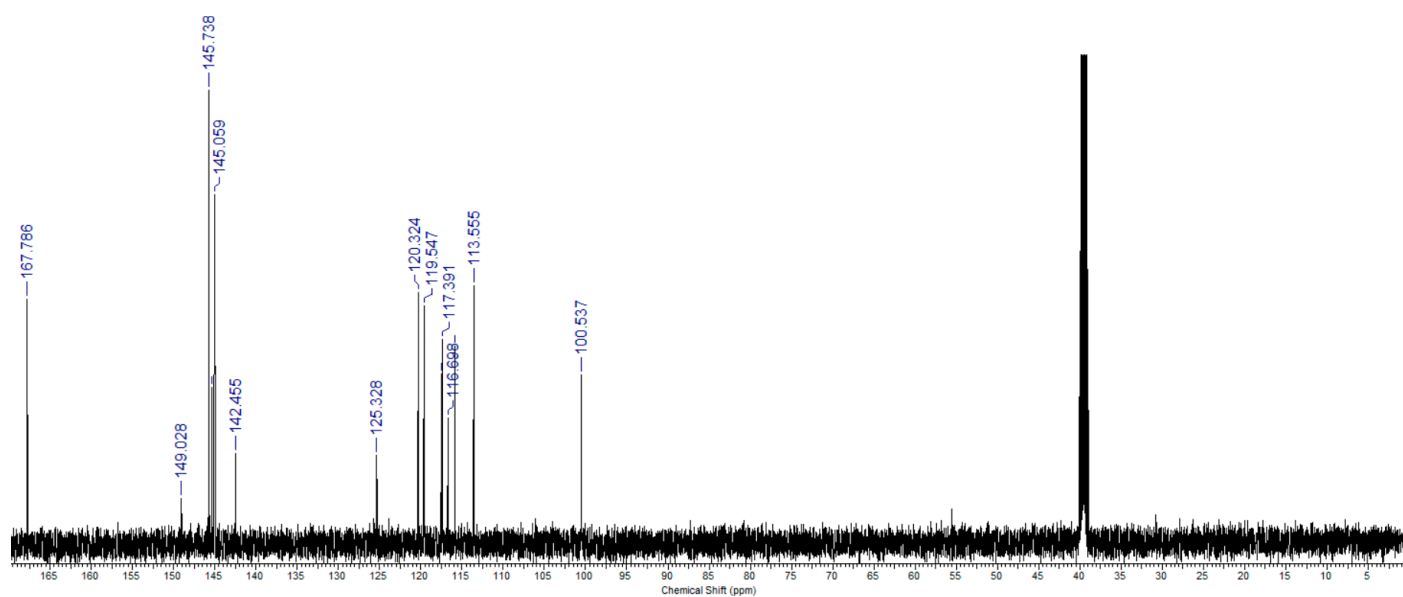

Figure S14. The <sup>13</sup>C NMR spectrum of the compound 7b.



## 2. Tables

Table S1. HOMO and LUMO frontier orbitals of compounds 6a-b and 7a-b.

| Compound | HOMO                                                                                                                        | LUMO                                                                                                                         |
|----------|-----------------------------------------------------------------------------------------------------------------------------|------------------------------------------------------------------------------------------------------------------------------|
| 6a       | 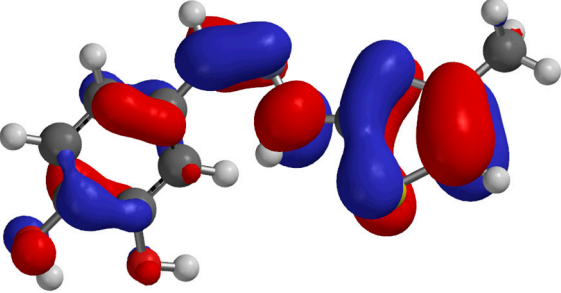<br>$E_{\text{HOMO}} = -5.30 \text{ eV}$   | <br>$E_{\text{LUMO}} = -1.13 \text{ eV}$   |
| 6b       | <br>$E_{\text{HOMO}} = -5.87 \text{ eV}$  | <br>$E_{\text{LUMO}} = -1.33 \text{ eV}$  |
| 7a       | <br>$E_{\text{HOMO}} = -5.08 \text{ eV}$ | <br>$E_{\text{LUMO}} = -1.16 \text{ eV}$ |
| 7b       | <br>$E_{\text{HOMO}} = -5.41 \text{ eV}$ | <br>$E_{\text{LUMO}} = -1.35 \text{ eV}$ |

**Table S2.** Electrostatic potential maps of compounds **6a-b** and **7a-b**.

| Compound | Electrostatic potential map                                                          |
|----------|--------------------------------------------------------------------------------------|
| 6a       | 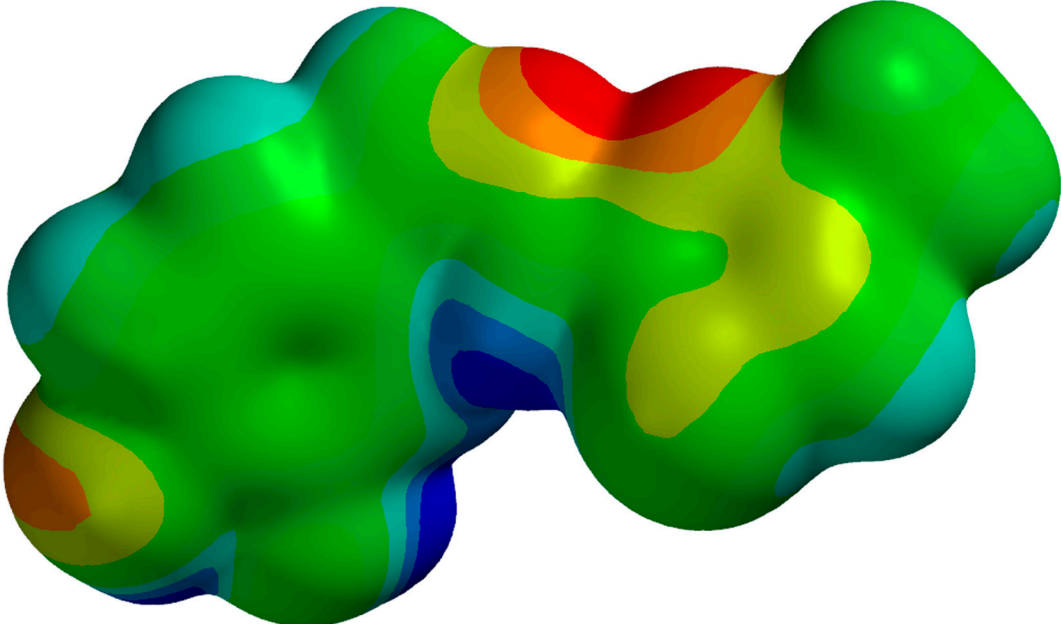  |
| 6b       |  |

7a

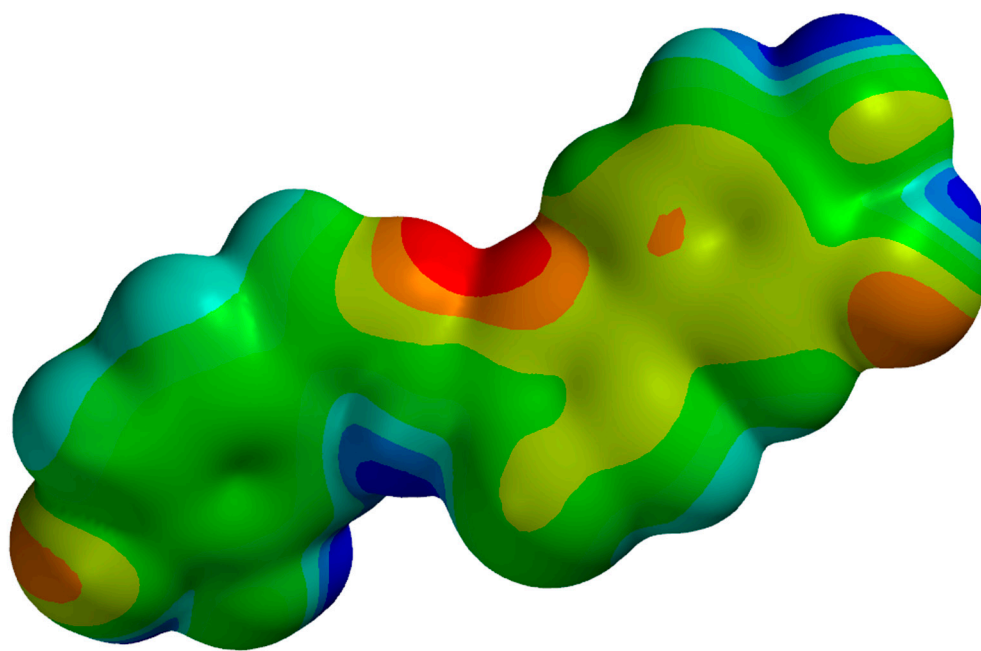

7b

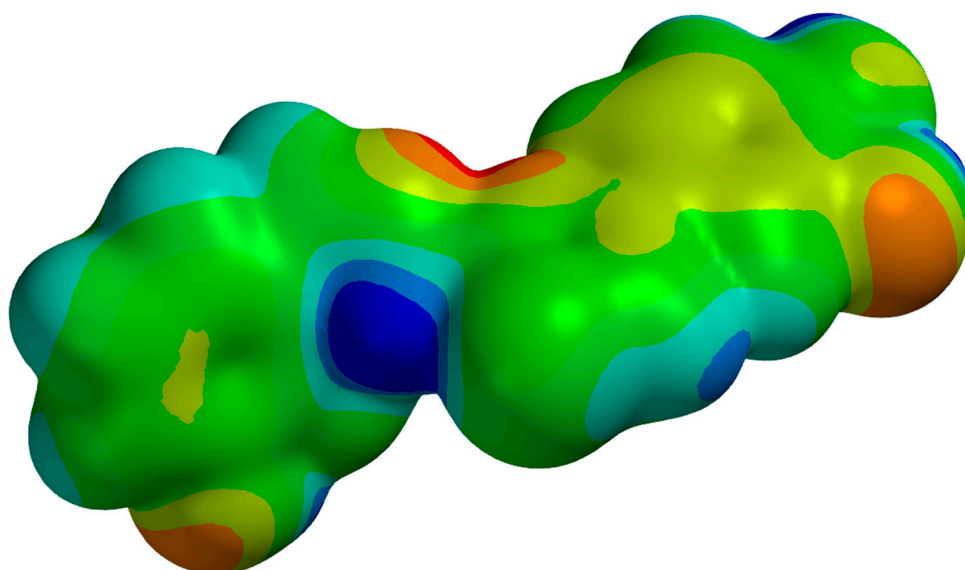

Supplement: s1 [file s1]
